# Supplementary material
Source: PubMed Central journal article supplement (PMC3032806)
Supplement: supp_kwq417_kwq417_Web_Tables.pdf [file supp_kwq417_kwq417_Web_Tables.pdf]

**Title:** The Relationship of Age and Height to Lung Function is the same among Whites, African-Americans, and Hispanics.

**Online Data Supplement**

**Web Table 1.** *P*-values for main effect terms for the forced expiratory volume in 6 seconds (FEV<sub>6</sub> in mL) among women in the National Health and Nutrition Examination Survey (NHANES III) with final reference equation on an additive scale, with beta coefficients and 95% confidence intervals.

| <b><i>P</i>-values for main effect terms</b>            |                |                        |                           |                         |                         |
|---------------------------------------------------------|----------------|------------------------|---------------------------|-------------------------|-------------------------|
| <b>FEV<sub>6</sub> Model</b>                            | <b>age</b>     | <b>age<sup>2</sup></b> | <b>height<sup>2</sup></b> | <b>African-American</b> | <b>Mexican-American</b> |
| Full model without interaction terms for race/ethnicity | <i>p</i> =0.11 | <i>p</i> <0.0001       | <i>p</i> <0.0001          | <i>p</i> <0.0001        | <i>p</i> =0.036         |
| Without main effect for age                             | -----          | <i>p</i> <0.0001       | <i>p</i> <0.0001          | <i>p</i> <0.0001        | <i>p</i> =0.038         |
| <b>FEV<sub>6</sub> Reference Equation</b>               |                |                        |                           |                         |                         |
| <b>Intercept</b>                                        | <b>age</b>     | <b>age<sup>2</sup></b> | <b>height<sup>2</sup></b> | <b>African-American</b> | <b>Mexican-American</b> |
| 266.9                                                   | -----          | -0.2345                | 0.1415                    | -606.6                  | -47.69                  |
| [30.02, 503.9]                                          |                | [-0.2455, -0.2235]     | [0.1329, 0.1500]          | [-649.3, -536.9]        | [-92.72, -2.650]        |

**Web Table 2.** *P*-values for main effect terms for the forced expiratory volume in 6 seconds (FEV<sub>6</sub> in mL) among men in the National Health and Nutrition Examination Survey (NHANES III) with final reference equation on an additive scale, with beta coefficients and 95% confidence intervals.

| <b>P-values for main effect terms</b>                   |                   |                        |                           |                         |                         |
|---------------------------------------------------------|-------------------|------------------------|---------------------------|-------------------------|-------------------------|
| <b>FEV<sub>6</sub> Model</b>                            | <b>age</b>        | <b>age<sup>2</sup></b> | <b>height<sup>2</sup></b> | <b>African-American</b> | <b>Mexican-American</b> |
| Full model without interaction terms for race/ethnicity | <i>p</i> =0.04    | <i>p</i> =0.02         | <i>p</i> <.0001           | <i>p</i> <.0001         | <i>p</i> =0.47          |
| Without main effect for Mexican-American ethnicity      | <i>p</i> =0.04    | <i>p</i> =0.03         | <i>p</i> <.0001           | <i>p</i> <.0001         | -----                   |
| <b>FEV<sub>6</sub> Reference Equation</b>               |                   |                        |                           |                         |                         |
| <b>Intercept</b>                                        | <b>age</b>        | <b>age<sup>2</sup></b> | <b>height<sup>2</sup></b> | <b>African-American</b> | <b>Mexican-American</b> |
| 315.0                                                   | -13.40            | -0.1505                | 0.1766                    | -804.6                  | -----                   |
| [-133.1, 763.0]                                         | [-26.22, -0.5752] | [-0.2829, -0.0180]     | [0.1649, 0.1883]          | [-872.5,-736.6]         |                         |

**Web Table 3.** Final reference equations with beta coefficients, *P*-values, and 95% confidence intervals for the forced expiratory volume in 1 second (FEV<sub>1</sub> in mL), the forced vital capacity (FVC in mL) and the FEV<sub>1</sub>/FVC ratio for women and men in the Multi-Ethnic Study of Atherosclerosis Lung (MESA-Lung) sample

| WOMEN                                         |                                            |                                               |                                                  |                                                      |                                                  |                                             |                                                |                                                |
|-----------------------------------------------|--------------------------------------------|-----------------------------------------------|--------------------------------------------------|------------------------------------------------------|--------------------------------------------------|---------------------------------------------|------------------------------------------------|------------------------------------------------|
|                                               | intercept                                  | age                                           | age <sup>2</sup>                                 | height <sup>2</sup>                                  | African-American                                 | Mexican-American                            | Non Mexican-American                           | Chinese-American                               |
| <b>FEV<sub>1</sub> Reference Equation</b>     | 1678<br><i>p</i> <0.0001<br>[1296, 2059]   | -22.78<br><i>p</i> <0.0001<br>[-25.21,-20.35] | -----                                            | 0.0800<br><i>p</i> <0.0001<br>[0.0685, 0.0916]       | -298.8<br><i>p</i> <0.0001<br>[-363.9, -233.8]   | -----                                       | -151.2<br><i>p</i> =0.0002<br>[-229.7,-72.71]  | -282.7<br><i>p</i> <0.0001<br>[-339.5, -225.9] |
| <b>FVC Reference Equation</b>                 | 798.5<br><i>p</i> =0.0003<br>[370.2,1226]  | -----                                         | -0.1688<br><i>p</i> <0.0001<br>[-0.1922,-0.1454] | 0.1104<br><i>p</i> <0.0001<br>[0.0956,0.1252]        | -451.494<br><i>p</i> <0.0001<br>[-535.3, -367.7] | -----                                       | -223.7<br><i>p</i> <0.0001<br>[-325.0,-122.5]  | -352.2<br><i>p</i> <0.0001<br>[-425.5,-279.0]  |
| MEN                                           |                                            |                                               |                                                  |                                                      |                                                  |                                             |                                                |                                                |
|                                               | intercept                                  | age                                           | age <sup>2</sup>                                 | height <sup>2</sup>                                  | African-American                                 | Mexican-American                            | Non Mexican-American                           | Chinese-American                               |
| <b>FEV<sub>1</sub> Reference Equation</b>     | 2707<br><i>p</i> <0.0001<br>[2053,3360]    | -32.06<br><i>p</i> <0.0001<br>[-36.30,-27.81] | -----                                            | 0.0853<br><i>p</i> <0.0001<br>[0.0677 , 0.1029]      | -544.6<br><i>p</i> <0.0001<br>[-655.3, -433.8]   | -----                                       | -179.4<br><i>p</i> =0.0002<br>[-315.2,-43.73]  | -354.3<br><i>p</i> =0.0096<br>[-462.6,-246.0]  |
| <b>FVC Reference Equation</b>                 | 1871<br><i>p</i> <0.0001<br>[998.2, 2743]  | -26.74<br><i>p</i> <0.0001<br>[-32.41,-21.07] | -----                                            | 0.1357<br><i>p</i> <0.0001<br>[0.1121,0.1592]        | -759.5<br><i>p</i> <0.0001<br>[-907.4, -611.6]   | -----                                       | -240.0<br><i>p</i> = 0.0094<br>[-421.2,-58.85] | -447.5<br><i>p</i> <0.0001<br>[-592.1, -303.0] |
| WOMEN AND MEN                                 |                                            |                                               |                                                  |                                                      |                                                  |                                             |                                                |                                                |
|                                               | intercept                                  | age                                           | age <sup>2</sup>                                 | height <sup>2</sup>                                  | African-American                                 | Mexican-American                            | Non Mexican-American                           | Chinese-American                               |
| <b>FEV<sub>1</sub>/FVC Reference Equation</b> | 101.7<br><i>p</i> <0.0001<br>[974.3,105.9] | -0.24<br><i>p</i> <0.0001<br>[-0.27,-0.20]    | -----                                            | -0.00035<br><i>p</i> <0.0001<br>[-0.00046, -0.00024] | 2.00<br><i>p</i> <0.0001<br>[1.115, 2.888]       | 1.192<br><i>p</i> =0.0369<br>[0.0725,2.313] | -----                                          | -----                                          |
